# Supplementary material
Source: Springer Nature journal article supplement (https://www.springermedizin.de/resource/supplementary/12995_2013_287_MOESM2_ESM.pdf/9623068)

| Case | Age | Sex | IS6110 DNA fingerprint |
|------|-----|-----|------------------------|
|------|-----|-----|------------------------|

|   |    |   |
|---|----|---|
| 1 | 25 | m |
|---|----|---|

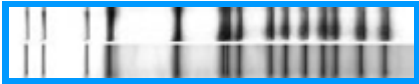

|            |
|------------|
| Index      |
| ENT doctor |

Supplement: MOESM2 [file 9623068]
